# Supplementary material
Source: PubMed Central journal article supplement (PMC9998366)
Supplement: NIHMS1863541-supplement-1.pdf [file NIHMS1863541-supplement-1.pdf]

## Supplemental Figures

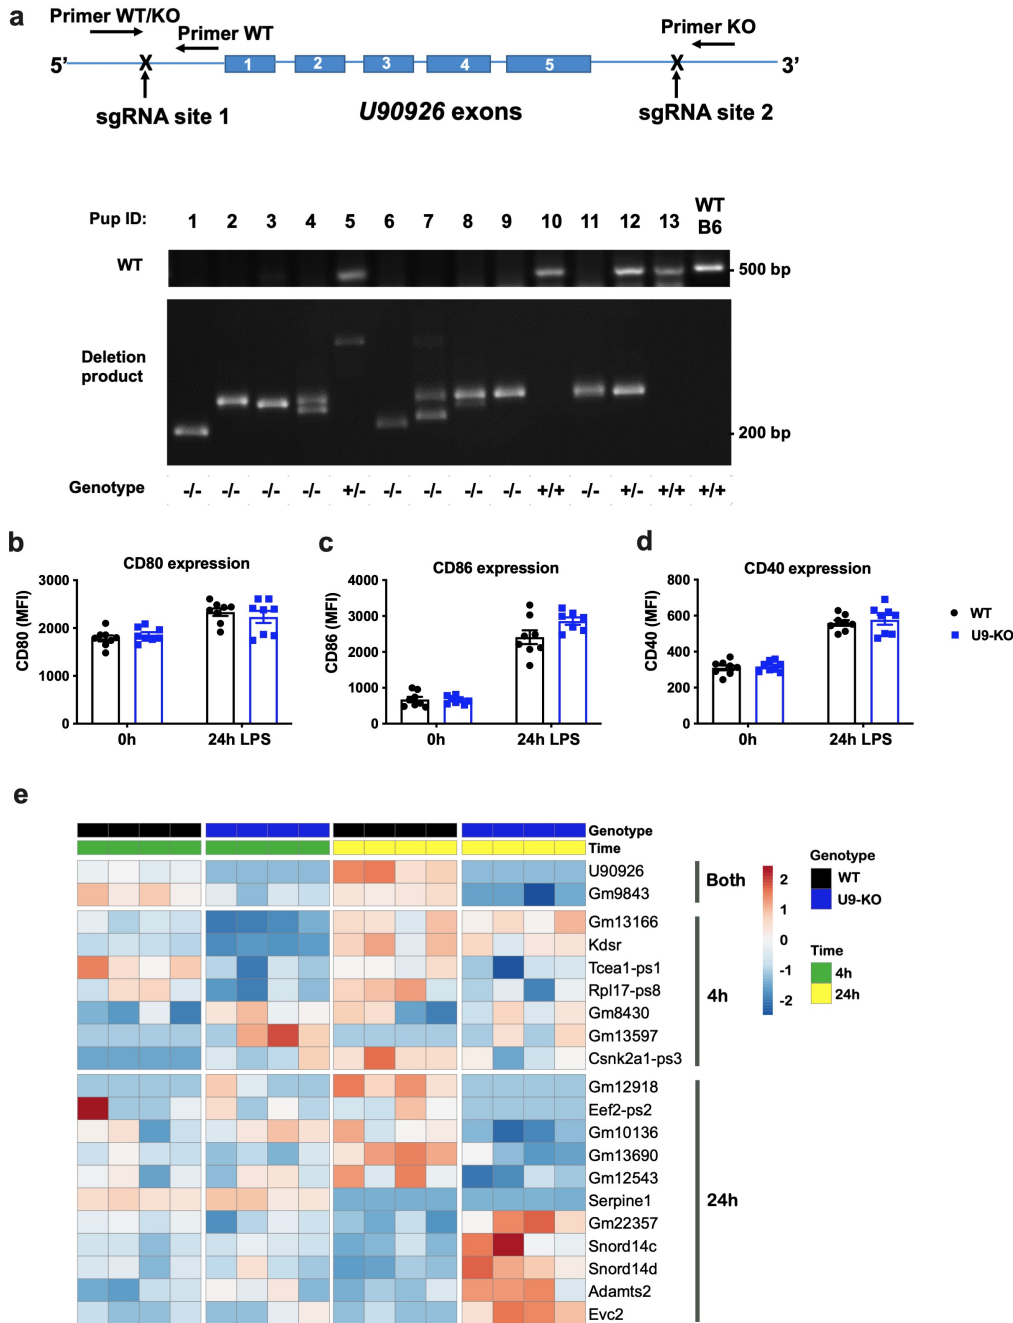

**Figure S1. Genotype screening of CRISPR/Cas9 edited pups and *U90926*-deficiency has none to minimal effect in BMDCs and BMDMs.** (a) Two sgRNAs and recombinant Cas9 were microinjected into mouse single-cell embryos. PCR genotyping results from the resulting offspring are shown. Two primer sets were used: one set targeting the WT region, (absent in KO), and a second set flanking the entire region, which only yields product if the deletion is present (200-500 bp, depending on size of deletion). Here, U9-KO = -/-, WT B6 = +/+, and heterozygous = +/- . (b-d) BMDCs were generated from WT and U9-KO mice and stimulated with 100ng/ml LPS for 24h. Cell surface expression of co-stimulatory markers, CD80, CD86, and CD40, was measured by flow cytometry and expressed as mean fluorescence intensity (MFI). Data are represented as the mean  $\pm$  SEM. Significance was determined by student's t test. (e) RNAseq data shown in Fig. 3k and 3l were reanalyzed using a relaxed cutoff of  $|\text{Log}_2 \text{ Fold Change}|=0.6$ ,  $\text{P}_{\text{adj}} < 0.2$ . A heatmap demonstrating the row-normalized gene expression of the top 20 (by log2 fold change) differentially expressed genes at the indicated time points in WT and U9-KO BMDM.

a) Cells transfected with U9-ORF-HA

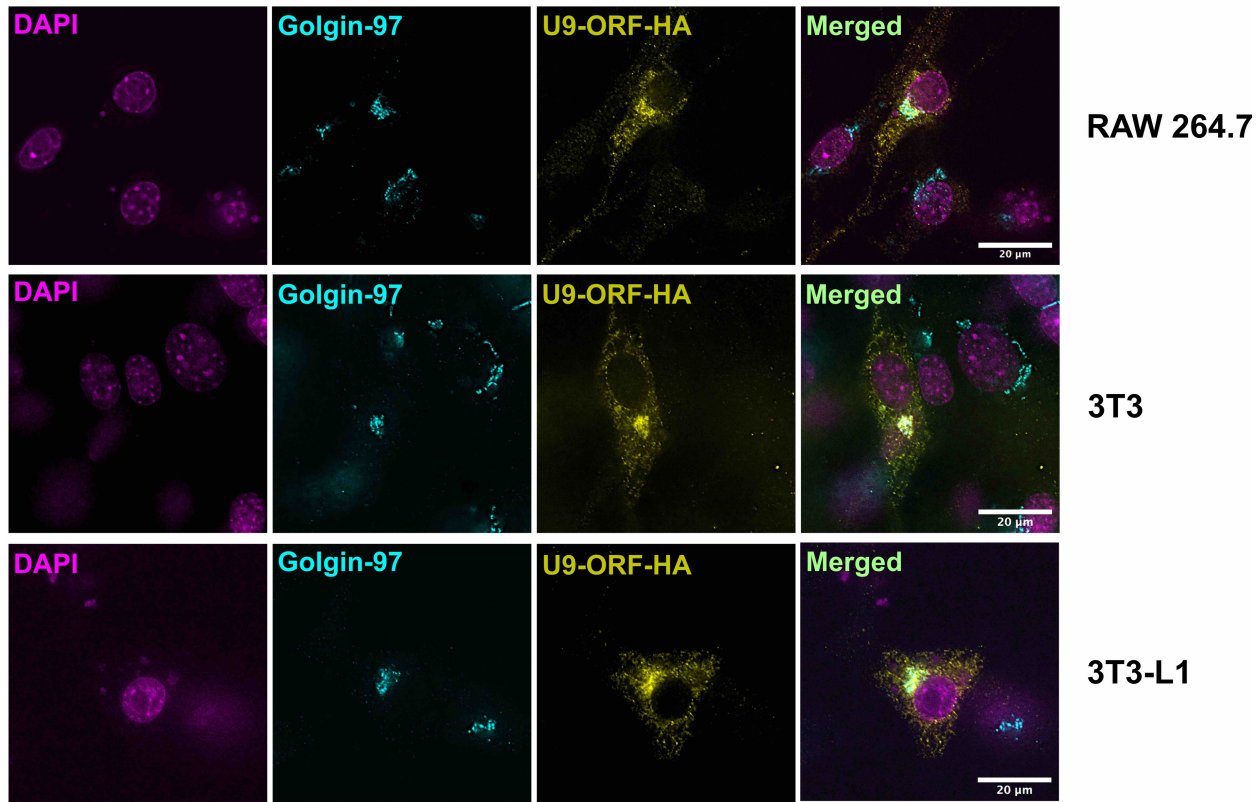

b) HeLa cells transfected with U9-ORF-HA and treated with Brefeldin A

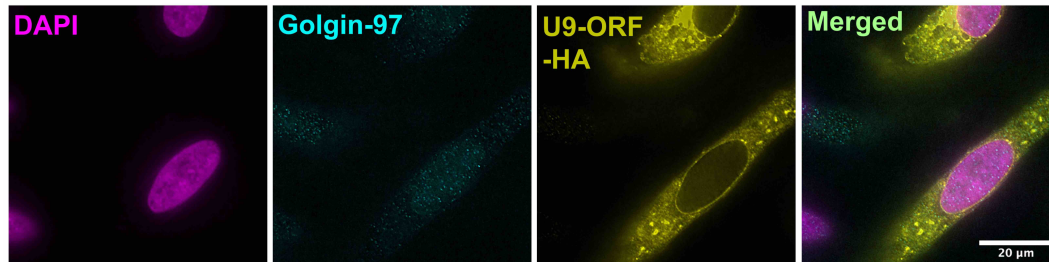

**Figure S2. U9-ORF protein localizes to the Golgi apparatus.** (a) RAW 264.7 mouse macrophages, mouse 3T3 fibroblasts, and mouse 3T3-L1 preadipocytes were transfected with U9-ORF-HA plasmid, followed by immunostaining. (b) HeLa cells were transfected with U9-ORF-HA plasmid and treated with Brefeldin A, followed by immunostaining. Stained markers are as follows, Golgin-97 (cyan; Golgi marker), HA (yellow: U9-ORF peptide), and DAPI nuclear staining (magenta).

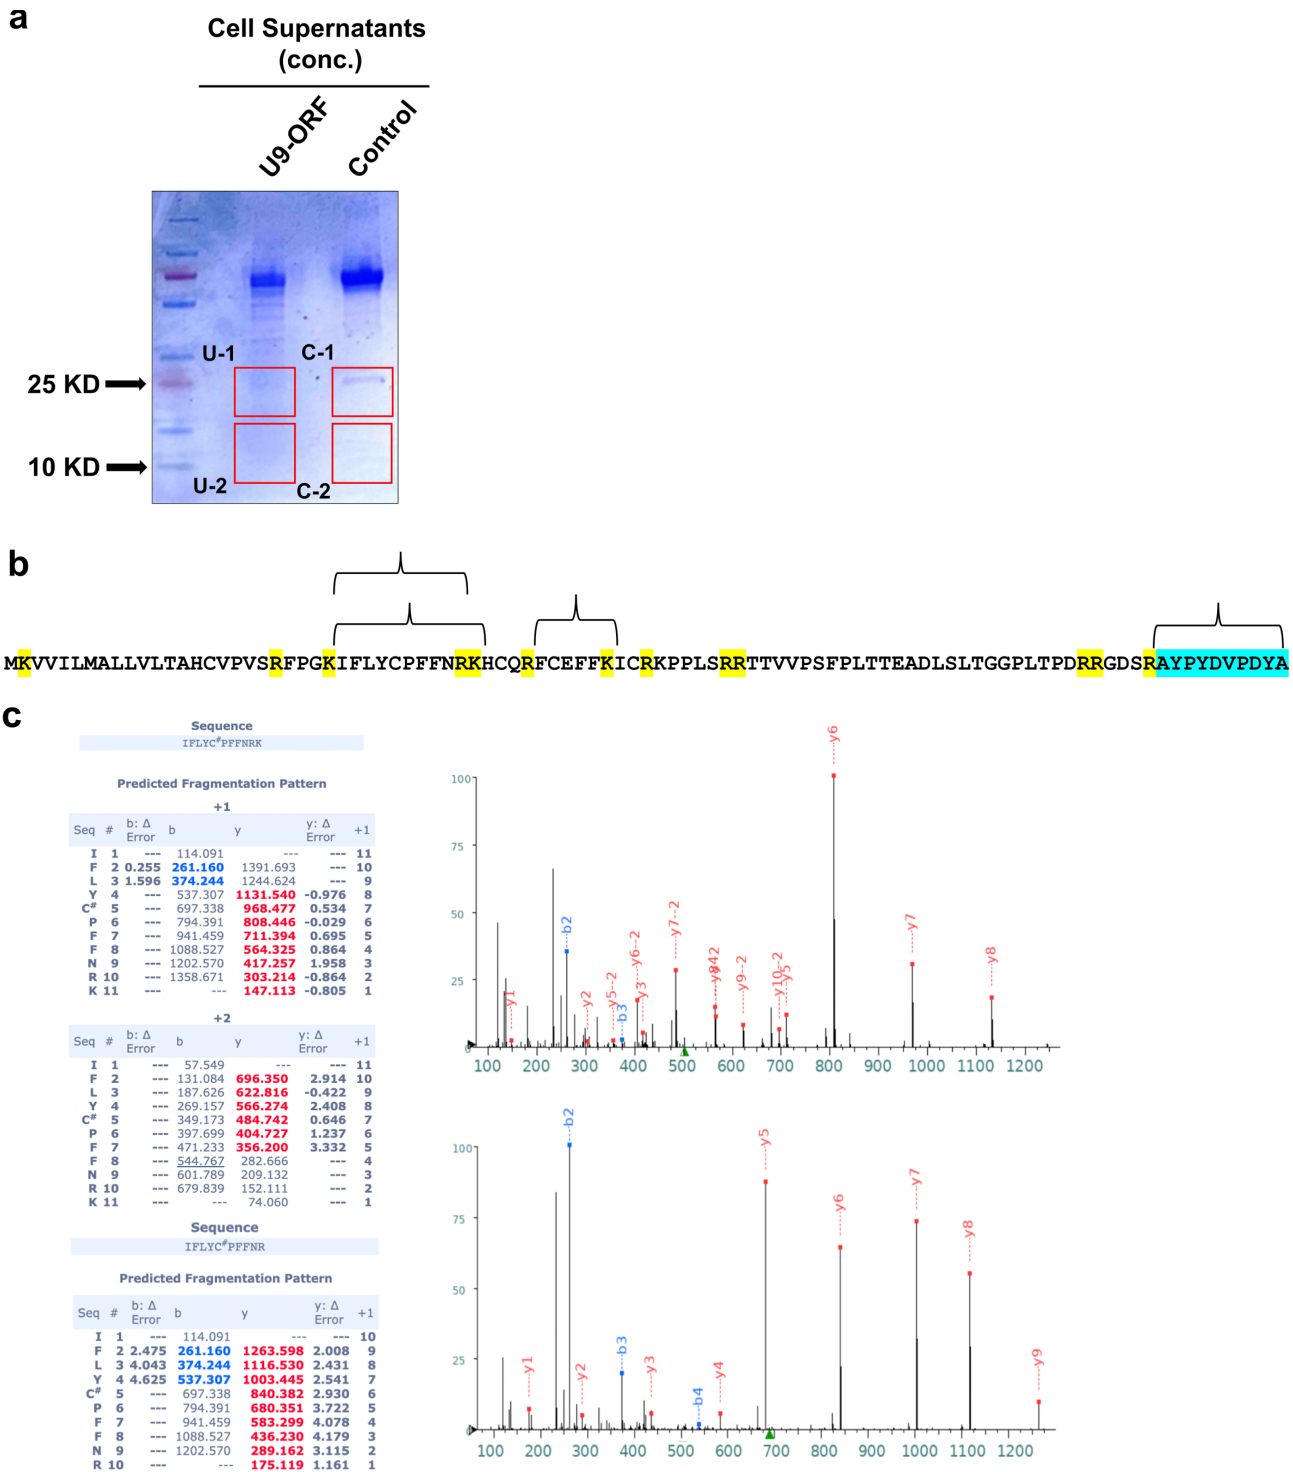

**Figure S3: LC-MS/MS identification of U9-ORF protein.** HeLa cells were mock-transfected (control) or transfected with a plasmid encoding U9-ORF-HA. Supernatant was collected and concentrated as described earlier and subjected to SDS-PAGE. The gel was stained with Coomassie blue (a). Gel regions shown in (a) were excised and subjected to in-gel tryptic digestion. Tryptic peptides were extracted and subjected to LC-MS/MS. Tryptic peptides for U9-ORF were identified only in the transfected sample and the high confidence identified peptides are listed in Table 1 and are graphically depicted in (b), with brackets indicating the identified tryptic fragments within the U9-ORF sequence. Note, yellow highlights indicate potential tryptic cleavage sites. Blue highlight indicates the HA-tag with an N-terminal alanine linker. (c) MS/MS spectra for two of the identified tryptic peptides showing with b- and y-type ions labeled. Mass tables are included for each spectrum denoting expected fragment ion masses and mass accuracy ( $\Delta$  Error, in ppm). Note upper and lower spectra overlap and display strong y-type ion series as expected.

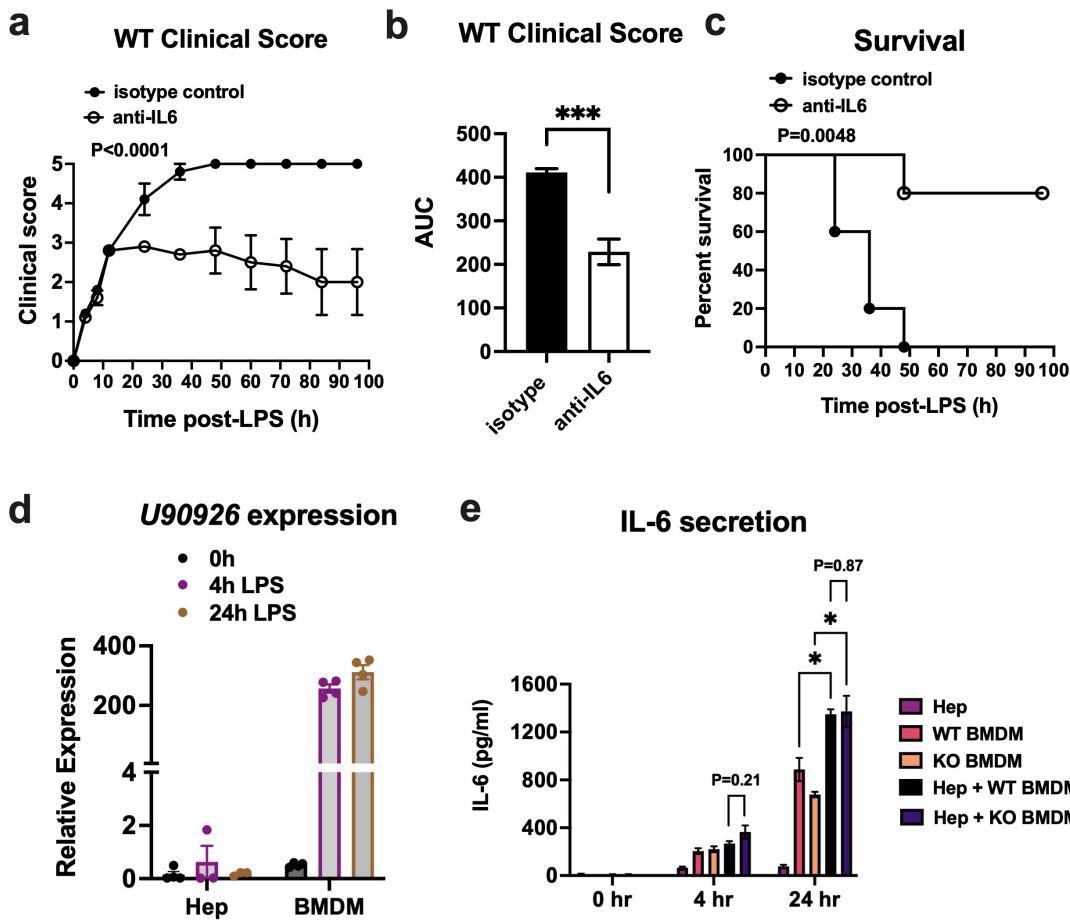

**Figure S4. IL-6 Neutralization is protective during LPS endotoxemia in WT mice challenged with a higher LPS dose, and U9-ORF regulation in heptocytes.** WT B6 mice (n=10) were challenged with high dose of LPS (60 mg/kg) and simultaneously administered isotype control (anti-trinitrophenol) or anti-IL-6 antibodies (100  $\mu$ g/mouse) by i.p. injection, followed by evaluation of sickness behavior (**a** and **b**) and survival (**c**). Area under the curve (AUC) is shown in (**b**), which was calculated from kinetic data in (**a**), to calculate a cumulative measurement of the disease severity. Clinical score evaluation measurement is described in the Methods section. (**d**) A mouse hepatocyte cell line, AML12, or BMDMs generated from WT B6 mice (n=4) and were stimulated with LPS (100 ng/ml) at different time points indicated above. RNA was extracted, followed by RT-qPCR to measure *U90926* expression. RT-qPCR data are expressed relative to the housekeeping gene, Beta-2-microglobulin (*B2m*), and multiplied by a factor of 10,000 for ease of visualization. Data are represented as the mean  $\pm$  SEM. (**e**) *In vitro* co-culture experiments were set up using mouse hepatocyte, AML12 and WT and U9-KO BMDMs at a 4:1 ratio and their control groups containing either AML12 or BMDM alone. Cells were stimulated with LPS (100ng/ml) for 4 and 24 hours and supernatants were analyzed by ELISA to measure IL-6 secretion. Significance of differences was assessed using 2-way ANOVA (panel a and e), Welch's T test (panel b) and Mantel-Cox test (panel c). P values are represented as follows: ns= >0.05, \*=  $\leq$ 0.05, \*\*= $\leq$ 0.01, \*\*\*= $\leq$ 0.001.
